# Supplementary material
Source: PubMed Central journal article supplement (PMC10080586)
Supplement: NIHMS1884696-supplement-1.pdf [file NIHMS1884696-supplement-1.pdf]

1  
2  
3 **Supplement**  
4  
5  
6  
7

8 **Increased bone turnover, osteoporosis, progressive tibial bowing, fractures, and scoliosis in**  
9 **a patient with a final-exon *SATB2* frameshift mutation**  
10  
11

12  
13  
14  
15 Philip M. Boone, Yiu Man Chan, Jill V. Hunter, Louis E. Pottkotter, Nelson A. Davino, Yaping  
16  
17 Yang, Joke Beuten, Carlos A. Bacino  
18  
19  
20  
21  
22  
23  
24  
25  
26  
27  
28  
29  
30  
31  
32  
33  
34  
35  
36  
37  
38  
39  
40  
41  
42  
43  
44  
45  
46  
47  
48  
49  
50  
51  
52  
53  
54  
55  
56  
57  
58  
59  
60

Supplemental Figures

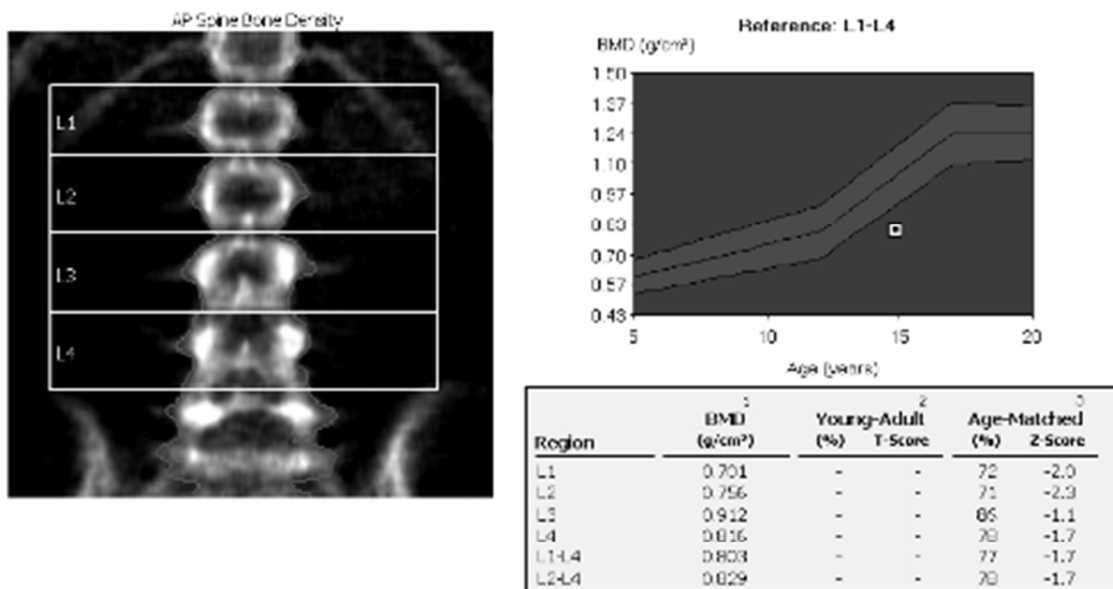

LAWICLE AND PELVIS  
AP SPINE AND HIPS  
Y COMPLETELY FLAT

**Figure S1. DXA scan at age 14 demonstrating decreased bone mineral density.** Bone mineral densitometry of the lumbar spine was performed on a GE Lunar Prodigy densitometer using a standard technique. Total body and hip films were not performed as the patient was not able to completely lie flat or motionless for the examination. Lumbar spine density (L1-L4) was 0.803g/cm<sup>3</sup>, resulting in a Z score of -1.7.

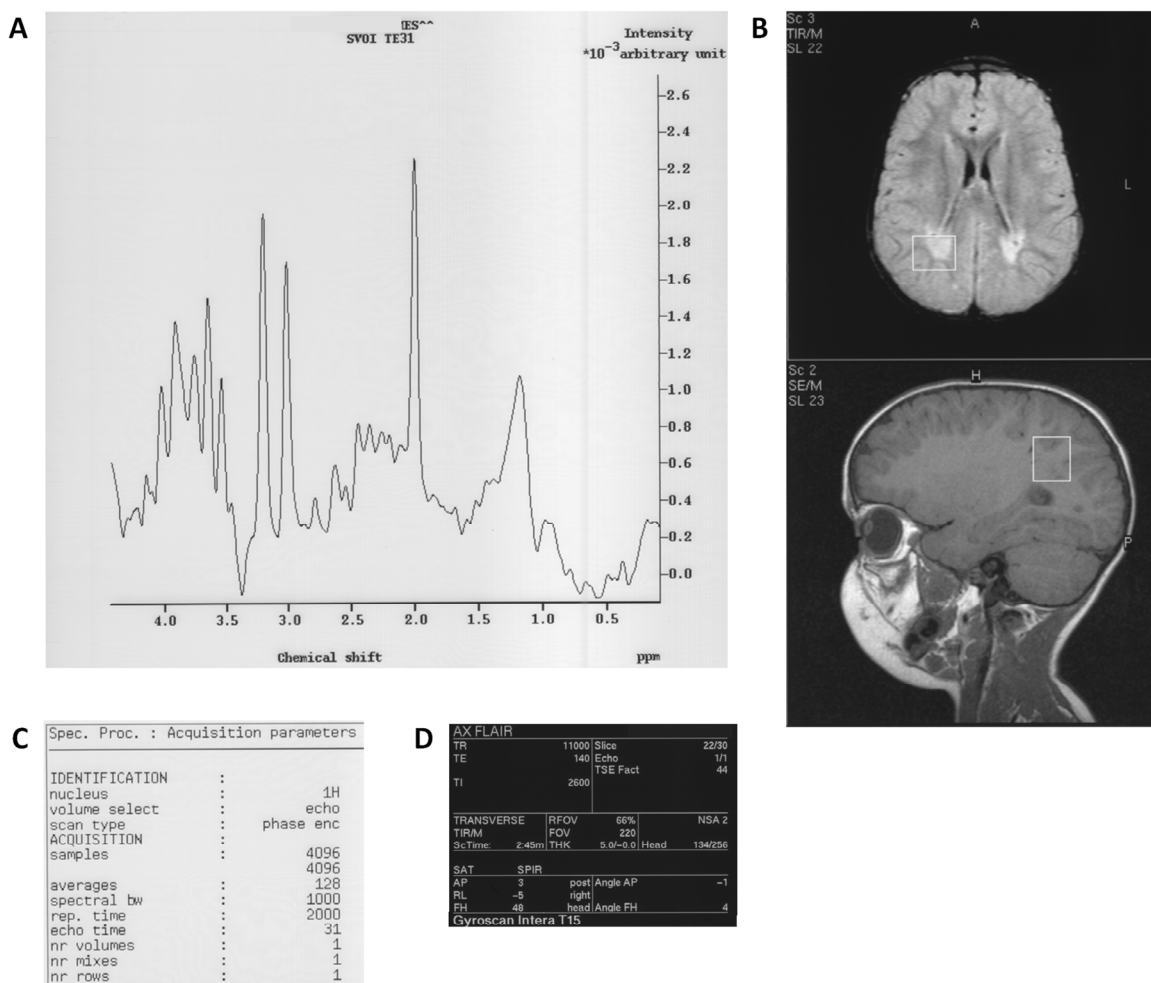

**Figure S2. Magnetic resonance spectroscopy (MRS) at age 3 years.** Single voxel short TE MR spectroscopy was performed in the periventricular white matter around the right atrium, demonstrating a broad lipid peak centered around 1.35 ppm. This is larger than would normally be expected and may reflect an abnormality of myelination in this region.

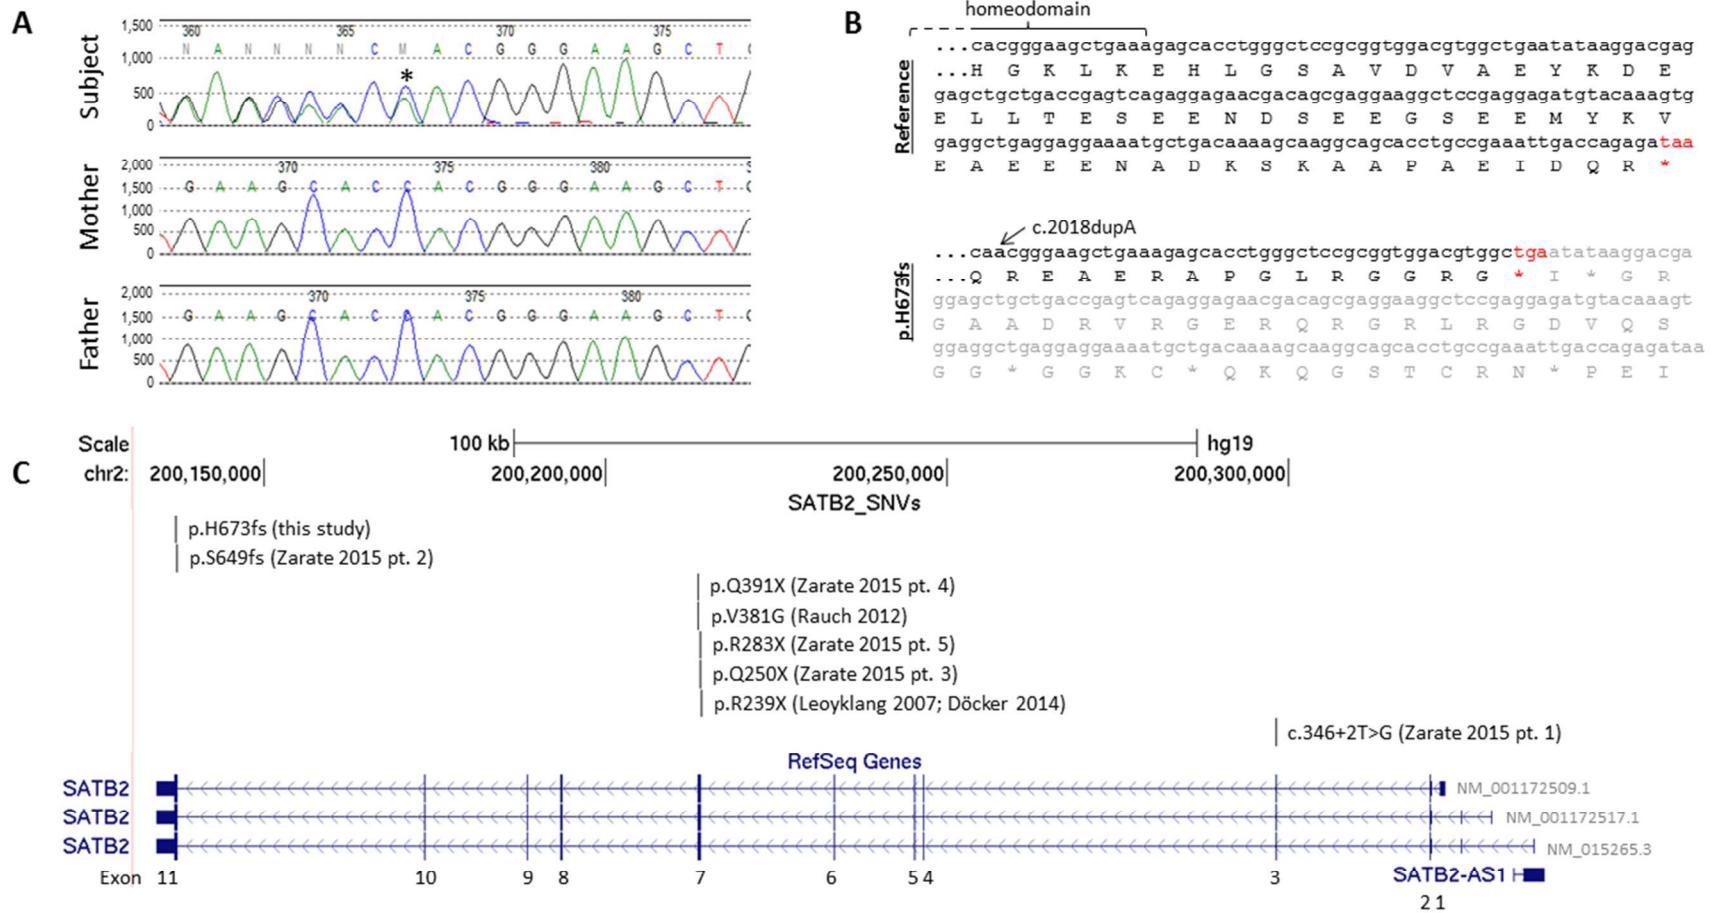

**Figure S3. The *SATB2* c.2018dupA (p.H673fs) mutation is apparently *de novo* and is predicted to disrupt the *SATB2* homeodomain and lead to premature truncation. a.** A heterozygous *SATB2* c.2018dupA mutation (\*) identified by exome sequencing is confirmed and found to be apparently *de novo* by bi-directional Sanger sequencing (displayed is 5' to 3' sequence using the

1  
2  
3 forward genomic primer). **b.** Nucleotide and protein sequence of *SATB2* (top, reference sequence; bottom, patient sequence) starting  
4 with codon 673. **c.** 2018dupA is predicted to alter the final five amino acids of the SATB2 homeodomain, followed by truncation after  
5  
6 10 additional aberrant amino acids or escape from nonsense-mediated decay. **c.** *SATB2* gene structure with all known deleterious point  
7  
8 mutations plotted. Note that the variant reported by Rauch et al. [2012] is a missense variant (predicted to be “probably damaging” by  
9  
10 PolyPhen2) reported in a female with severe intellectual disability, mild facial dysmorphism, and a bifid uvula without cleft palate  
11  
12  
13 [Rauch et al., 2012].  
14  
15  
16  
17  
18  
19  
20  
21  
22  
23  
24  
25  
26  
27  
28  
29  
30  
31  
32  
33  
34  
35  
36  
37  
38  
39  
40  
41  
42  
43  
44  
45  
46  
47  
48  
49

Table S1. Laboratory results.

| Test                                                   | Value (normal range if abnormal value)                                                                                        | Age              |
|--------------------------------------------------------|-------------------------------------------------------------------------------------------------------------------------------|------------------|
| <b>Bone studies</b>                                    |                                                                                                                               |                  |
| Alkaline phosphatase                                   | <b>1063 IU/L (H)</b> (92-468)<br>Bone fraction 89%                                                                            | 13y              |
| “ ”                                                    | <b>873 IU/L (H)</b> (107-340)                                                                                                 | 14y              |
| “ ”                                                    | <b>813 IU/L (H)</b>                                                                                                           | 16y <sup>b</sup> |
| “ ”                                                    | <b>965 IU/L (H)</b>                                                                                                           | 16y <sup>c</sup> |
| Calcium, serum                                         | 10.3 mg/dL                                                                                                                    | 13y              |
| “ ”                                                    | 9.7 mg/dL                                                                                                                     | 14y              |
| “ ”                                                    | 9.8 mg/dL                                                                                                                     | 16y <sup>b</sup> |
| “ ”                                                    | 10.2 mg/dL                                                                                                                    | 16y <sup>c</sup> |
| Calcium, random urine                                  | 4.2 mg/dL (no range available)                                                                                                | 14y              |
| Calcitonin                                             | < 2 pg/mL                                                                                                                     | 13y              |
| Calcitonin                                             | < 2 pg/mL                                                                                                                     | 16y <sup>c</sup> |
| C-telopeptide                                          | 1514 pg/mL (435-2924)                                                                                                         | 16y <sup>b</sup> |
| C-telopeptide                                          | <b>3165 pg/ml (H)</b> (435-2924)                                                                                              | 16y <sup>c</sup> |
| N-telopeptide, urine                                   | 31,610 nmol BCE (no range available)                                                                                          | 14y              |
| N-telopeptide/creatinine ratio, urine                  | <b>2885 nmol BCE/mM Cr (H)<sup>a</sup></b><br>(male tanner stage: I = 55-508; II = 21-423; III = 27-462; IV = <609; V = <240) | 14y              |
| Osteocalcin                                            | <b>77 ng/mL (H)</b>                                                                                                           | 13y              |
| “ ”                                                    | <b>105.1 ng/mL (H)<sup>a</sup></b> (3.2-39.6)                                                                                 | 14y              |
| “ ”                                                    | <b>81 ng/ml (H)</b>                                                                                                           | 16y <sup>b</sup> |
| “ ”                                                    | <b>66 ng/mL</b>                                                                                                               | 16y <sup>c</sup> |
| PTH, intact                                            | 19 pg/mL                                                                                                                      | 13y              |
| “ ”                                                    | 46 pg/mL                                                                                                                      | 14y              |
| “ ”                                                    | 37 pg/mL                                                                                                                      | 16y <sup>b</sup> |
| “ ”                                                    | 37 pg/mL                                                                                                                      | 16y <sup>c</sup> |
| Phosphorus                                             | <b>4.9 mg/dL (H)</b> (2.5-4.5)                                                                                                | 13y              |
| “ ”                                                    | <b>5.0 mg/dL (H)</b> (2.5-4.5)                                                                                                | 16y <sup>b</sup> |
| “ ”                                                    | <b>5.4 mg/dL (H)</b> (2.5-4.5)                                                                                                | 16y <sup>c</sup> |
| Procollagen type I intact N-terminal propeptide (PINP) | <b>1470 mcg/ml</b> (normal 22-87 mcg/ml for males >18yo; no pediatric reference values exist)                                 | 16y <sup>c</sup> |
| Vitamin D, 25-OH                                       | Total, 39 ng/mL<br>D3, 39 ng/mL<br>D2, <4 ng/mL                                                                               | 13y              |
| “ ”                                                    | Total, 35.2 ng/mL                                                                                                             | 14y              |
| “ ”                                                    | Total, 30 ng/mL                                                                                                               | 16y <sup>c</sup> |
| Vitamin D, 1-, 25- (OH) <sub>2</sub>                   | Total, 67 pg/mL<br>D3, 67 pg/mL<br>D2, <8 pg/mL                                                                               | 13y              |
| “ ”                                                    | Total, <b>186.0 pg/mL (H)<sup>a</sup></b> (10.0-75.0)                                                                         | 14y              |

<sup>a</sup> Verified by repeat testing.

<sup>b</sup> 3-4 months post first dose of denosumab.

<sup>c</sup> Prior to second dose.

BCE, Bone Collagen Equivalent

Table S1, cont'd.

| Genetic studies                                                                                                                                        |                                                                                                                                                                                                                                                                                                                                           |        |
|--------------------------------------------------------------------------------------------------------------------------------------------------------|-------------------------------------------------------------------------------------------------------------------------------------------------------------------------------------------------------------------------------------------------------------------------------------------------------------------------------------------|--------|
| Karyotype                                                                                                                                              | 46, XY                                                                                                                                                                                                                                                                                                                                    | 2y     |
| Telomere FISH                                                                                                                                          | No rearrangements seen                                                                                                                                                                                                                                                                                                                    | 2y     |
| Angelman/Prader-Willi syndrome methylation studies                                                                                                     | Normal pattern                                                                                                                                                                                                                                                                                                                            | 2y     |
| Chromosomal microarray analysis (Baylor CMA-HR+SNP, V9.1.1)                                                                                            | No reportable nuclear genome CNVs; no mitochondrial deletions; no increased blocks of absence of heterozygosity (AOH)                                                                                                                                                                                                                     | 14y    |
| Exome sequencing (Methodology: <a href="https://www.bcm.edu/research/medical-genetics-labs/">https://www.bcm.edu/research/medical-genetics-labs/</a> ) | Deleterious mutations in genes related to clinical phenotype:<br><i>De novo</i> c.2018dupA (p.H673fs) mutation in <i>SATB2</i><br><br>VUSs in disease genes related to the clinical phenotype:<br>Paternally inherited c.4598C>T (p.A1533V) mutation in <i>NRXN2</i><br>Paternally inherited c.107C>T (p.T36M) mutation in <i>SPECCIL</i> | 14y    |
| Metabolic studies                                                                                                                                      |                                                                                                                                                                                                                                                                                                                                           |        |
| Coenzyme Q10, total                                                                                                                                    | 0.87 µg/mL                                                                                                                                                                                                                                                                                                                                | 14y    |
| Folate (folic acid), serum                                                                                                                             | >19.9 ng/mL                                                                                                                                                                                                                                                                                                                               | 14y    |
| Lactate                                                                                                                                                | 1.3 mmol/L                                                                                                                                                                                                                                                                                                                                | 2y     |
| Pyruvate                                                                                                                                               | 0.3 mmol/L                                                                                                                                                                                                                                                                                                                                | 2y     |
| Vitamin B <sub>12</sub>                                                                                                                                | 399 pg/mL                                                                                                                                                                                                                                                                                                                                 | 14y    |
| Vitamin K <sub>1</sub>                                                                                                                                 | 0.52 ng/mL                                                                                                                                                                                                                                                                                                                                | 14y    |
| Neurological studies                                                                                                                                   |                                                                                                                                                                                                                                                                                                                                           |        |
| Anti-folate antibodies, serum                                                                                                                          | <b>6.55 pmol IgG/ml (H)<sup>d</sup></b>                                                                                                                                                                                                                                                                                                   | 13y    |
| Anti-Neuronal Cell Ab                                                                                                                                  | <b>301 Units (H) (0-54)</b>                                                                                                                                                                                                                                                                                                               | 4y 5m  |
| “ ”                                                                                                                                                    | <b>76 Units (H) (0-54)</b>                                                                                                                                                                                                                                                                                                                | 4y 9m  |
| “ ”                                                                                                                                                    | <b>326 Units (H) (0-54)</b>                                                                                                                                                                                                                                                                                                               | 4y 11m |
| “ ”                                                                                                                                                    | <b>298 Units (H) (0-54)</b>                                                                                                                                                                                                                                                                                                               | 6y 1m  |
| Myelin basic protein antibody, serum ELISA                                                                                                             | IgG: 70 Units<br>IgM: 78 Units (H) (0-50)                                                                                                                                                                                                                                                                                                 | 4y 9m  |

<sup>d</sup> On account of this laboratory study consistent with (but not diagnostic of) cerebral folate deficiency, the patient takes oral leucovorin (folinic acid). Other medicines include mometasone furoate nasal spray for allergies and low-dose baclofen for spasticity.

Table S1, cont'd.

| Immunological Studies                                    |                                                                                                                                                                                                                                                                                                                                                                                                                                                                                                                                        |    |
|----------------------------------------------------------|----------------------------------------------------------------------------------------------------------------------------------------------------------------------------------------------------------------------------------------------------------------------------------------------------------------------------------------------------------------------------------------------------------------------------------------------------------------------------------------------------------------------------------------|----|
| CBC                                                      | WBC: <b>4.08 10<sup>3</sup>/μL (L)</b> (5.0-19.5)<br>RBC: 4.59 10 <sup>6</sup> /μL (3.9-5.3)<br>HGB: <b>13.9 g/dL (H)</b> (11.5-13.5)<br>HCT: 38.8 % (34.0-40.0)<br>MCV: 84.6 fL (75.0-85.0)<br>MCH: <b>30.2 pg (H)</b> (25.0-29.0)<br>MCHC: 35.7 g/dL (33.0-37.0)<br>RDW: 14.4 %<br>Platelets: 263 10 <sup>3</sup> /μL (150-450)<br>MPV 6.7 FL<br>TYPE AUTO<br>SEG% 45 % 23-61<br>LYMPH% 46 % 28-65<br>MONO% 5 % 0-5<br>EOS% 3 % 0-3<br>BASO% 1 % 0-1<br>ANC 1.83 10 <sup>3</sup> /UL<br>! LYMPH# 1.75<br>! MONO# 0.21<br>! EOS# 0.11 | 4y |
| Lymphocyte subset panel (5-total lymphocyte enumeration) | ABS CD4: 818/μL<br>%CD19: 22%<br>%CD4: 43%<br>CD4:CD8 ratio: 1.65<br>ABS CD8: 496/μL<br>%CD8: 26%<br>ABS CD3: 1450/μL<br>%CD3: 73%<br>ABS CD19: 461/μL<br>ABS NK-Cells: <b>58/μL (L)</b> (60-590)<br>%CD16+, CD56+, CD3-: <b>3% (L)</b> (4-26)                                                                                                                                                                                                                                                                                         | 4y |



Table S1, cont'd.

| Other studies                                                                                                                                                                                                                                                                                               |                                                                       |     |
|-------------------------------------------------------------------------------------------------------------------------------------------------------------------------------------------------------------------------------------------------------------------------------------------------------------|-----------------------------------------------------------------------|-----|
| Apolipoprotein E mutation testing                                                                                                                                                                                                                                                                           | APO e2/e3 genotype                                                    | 6y  |
| Ova and parasites, stool                                                                                                                                                                                                                                                                                    | No ova or parasites seen                                              | 4y  |
| C Difficile tox a/b, stool                                                                                                                                                                                                                                                                                  | negative                                                              | 4y  |
| Trichrome stain, stool                                                                                                                                                                                                                                                                                      | No ova or parasites seen                                              | 4y  |
| Occult blood stool                                                                                                                                                                                                                                                                                          | Negative                                                              | 4y  |
| Copper, plasma                                                                                                                                                                                                                                                                                              | 1.22 µg/mL                                                            | 14y |
| Copper, RBC                                                                                                                                                                                                                                                                                                 | 0.55 µg/mL                                                            | 14y |
| Creatinine, urine                                                                                                                                                                                                                                                                                           | 123.8 mg/dL                                                           | 14y |
| IBD Panel (Prometheus laboratories) *The qualitative IBD FIRST STEP result is derived from evaluation of results from four modified proprietary ELISA assays:<br>a) Anti-Omp C IgA ELISA, b) ASCA IgA ELISA, c) ASCA IgG ELISA, and d) Neutrophil-Specific Nuclear Autoantibodies ELISA (previously pANCA). | First step markers not detected                                       | 4y  |
| measles and mumps                                                                                                                                                                                                                                                                                           | Measles and mumps immune (IgG)                                        | 13y |
| Intestinal isoenzyme                                                                                                                                                                                                                                                                                        | 4% (2-12% for 10-13 year olds)                                        | 13y |
| Antigliadin IgG                                                                                                                                                                                                                                                                                             | 45 (H) <sup>e</sup>                                                   | 4y  |
| Antigliadin IgA                                                                                                                                                                                                                                                                                             | 8 (nl) <sup>e</sup>                                                   | 4y  |
| Tissue transglutaminase                                                                                                                                                                                                                                                                                     | IgG 17 (nl)<br>IgM 45 (nl)                                            | 4y  |
| Antigliadin IgG (native)<br>Note that this test is for “detection of IgG antibodies to native gliadin in human serum to aid in the diagnosis of non-celiac gluten sensitivity in conjunction with other clinical and lab findings. Not recommended for Celiac disease screening”                            | 39 H (0-19 neg, 20-30 weak positive, >30 moderate to strong positive) | 14y |
| Renin activity, plasma                                                                                                                                                                                                                                                                                      | 5.31 ng/mL/hr (H) (0.50 - 3.30)                                       | 14y |

<sup>e</sup> The patient's low weight prompted a celiac disease workup at age 4 years; while an antigliadin IgG test was positive (45 Units), antigliadin IgA and tissue transglutaminase levels were normal and a duodenal biopsy showed only mild, non-specific chronic inflammation of the lamina propria, excluding the diagnosis of celiac disease.
